# Supplementary material
Source: PubMed Central journal article supplement (PMC8478000)
Supplement: 41581_2021_483_MOESM1_ESM.pdf [file 41581_2021_483_MOESM1_ESM.pdf]

**Supplementary information**

---

**Evolutionary genetics and acclimatization  
in nephrology**

---

In the format provided by the  
authors and unedited

Supplementary Table 1 | CKD-associated GWAS genes under natural selection

| GeneID                        | Coordinates               | FayWu_H | Fst   | FuLi_D | FuLi_F | iHS   | Tajima_D | Statistic:Population values                                                                                                                                                                  | statistic                  | GeneID                        |
|-------------------------------|---------------------------|---------|-------|--------|--------|-------|----------|----------------------------------------------------------------------------------------------------------------------------------------------------------------------------------------------|----------------------------|-------------------------------|
| ACADL                         | chr2:211079830-211099830  | -1.521  | 0.045 | -6.716 | -6.501 | 1.729 | -2.465   | FuLi_D:GIH:-6.716;FuLi_F:CHB:-6.501;GIH:-5.868                                                                                                                                               | FuLi_D;FuLi_F              | ACADL                         |
| ADAMTS3                       | chr4:73418842-73428842    | -4.351  | 0.098 | -6.922 | -5.643 | 1.271 | -2.3     | FuLi_D:GIH:-6.922                                                                                                                                                                            | FuLi_D                     | ADAMTS4                       |
| ADCY8                         | chr8:131820262-131830262  | 1.175   | 0.082 | 1.984  | 1.587  | 0.964 | 1.554    | FuLi_D:ACB:1.984                                                                                                                                                                             | FuLi_D                     | ADCY8                         |
| ADCY8                         | chr8:132033894-132043894  | -1.198  | 0.038 | -7.681 | -6.132 | 1.169 | -1.918   | FuLi_D:CEU:-7.681;FuLi_F:CEU:-6.132                                                                                                                                                          | FuLi_D;FuLi_F              | ADCY8                         |
| AFF3                          | chr2:100509100-100535888  | -2.82   | 0.044 | -8.011 | -6.513 | 0.866 | -2.09    | FuLi_D:IBS:-8.011;FuLi_F:IBS:-6.513                                                                                                                                                          | FuLi_D;FuLi_F              | AFF4                          |
| nonCoding86016;AF             | chr22:36598663-36638663   | -4.817  | 0.156 | -3.407 | -2.822 | 3.028 | 3.646    | XPEHH:CEU2CHB:1.964                                                                                                                                                                          | XPEHH                      | nonCoding86016;APOL3          |
| OAS1                          | chr12:113360155-113370155 | -4.694  | 0.223 | -2.277 | 2.727  | 2.291 | 3.83     | Fst:CEU2YRI:0.223                                                                                                                                                                            | Fst                        | OAS2                          |
| RRAS2                         | chr11:14334826-14344826   | -1.202  | 0.022 | -7.841 | -6.374 | 1.493 | -1.951   | FuLi_D:BEB:-7.841;FuLi_F:BEB:-6.374                                                                                                                                                          | FuLi_D;FuLi_F              | RRAS3                         |
| PRR4;TAS2R14;PRH              | chr12:11114200-11124200   | -5.392  | 0.026 | 2.47   | 3.098  | 1.234 | 3.591    | FuLi_D:PJL:2.47                                                                                                                                                                              | FuLi_D                     | PRR4;TAS2R14;PRH1;ACO         |
| PRR4;TAS2R50;TAS              | chr12:11135776-11165776   | -3.424  | 0.343 | 2.274  | 3.661  | 1.168 | 4.14     | Fst:YRI2CHB:0.343                                                                                                                                                                            | Fst                        | PRR4;TAS2R50;TAS2R14;         |
| PRR4;TAS2R14;PRH              | chr12:11195267-11268835   | -1.383  | 0.095 | -6.193 | -4.635 | 5.769 | 2.066    | iHS:ASW:5.452;BEB:5.513;CDX:5.269;CHB:5.49;CHS:5.73;ESN:3.99;FIN:4.304;GIH:5.246;GWD:3.574;IBS:3.199;ITU:5.388;JPT:5.769;KHV:5.632;LWK:3.331;MSL:4.226;PJL:5.287;STU:5.3;TSI:4.279;YRI:4.343 | iHS                        | PRR4;TAS2R14;PRH1;ACO         |
| PRR4;TAS2R14;PRH              | chr12:11278835-11298835   | -2.021  | 0.133 | -2.412 | 2.943  | 2.712 | 3.713    | XPEHH:YRI2CHB:2.809                                                                                                                                                                          | XPEHH                      | PRR4;TAS2R14;PRH1;TAS         |
| ATXN2;SH2B3                   | chr12:111713158-112011420 | -4.041  | 0.139 | -6.852 | -5.614 | 5.128 | -2.144   | iHS:CEU:3.447;GBR:4.358;IBS:4.452;TSI:5.128                                                                                                                                                  | iHS                        | ATXN2;SH2B4                   |
| BCAS3                         | chr17:58759079-58821101   | -5.578  | 0.134 | -7.096 | -5.946 | 3.298 | -2.78    | FuLi_F:CEU:-5.946;Tajima_D:IBS:-2.78;TSI:-2.633;XPEHH:CEU2YRI:3.073                                                                                                                          | FuLi_F;Tajima_D;XPEHH      | BCAS3                         |
| BCAS3                         | chr17:59067495-59077495   | -6.911  | 0.155 | -5.111 | -4.751 | 2.011 | -2.628   | FayWu_H:IBS:-6.911                                                                                                                                                                           | FayWu_H                    | BCAS3                         |
| BCAS3                         | chr17:59157833-59177833   | -2.56   | 0.104 | -7.365 | -6.401 | 2.385 | -2.676   | FuLi_D:STU:-6.577;TSI:-7.365;FuLi_F:IBS:-6.254;STU:-5.886;TSI:-6.401                                                                                                                         | FuLi_D;FuLi_F              | BCAS3                         |
| C3orf67                       | chr3:58807879-58887186    | -2.293  | 0.055 | -6.657 | -5.518 | 3.456 | -2.555   | iHS:BEB:3.456;JPT:3.369                                                                                                                                                                      | iHS                        | C3orf67                       |
| C3orf67                       | chr3:58937298-58947298    | -2.979  | 0.042 | -5.296 | -4.998 | 2.425 | -2.263   | FuLi_D:MSL:-5.296                                                                                                                                                                            | FuLi_D                     | C3orf67                       |
| CCDC91                        | chr12:28426954-28570909   | -2.183  | 0.06  | -6.203 | -5.496 | 3.246 | -2.434   | FuLi_D:ESN:-6.203;MSL:-6.202;FuLi_F:ESN:-5.423;MSL:-5.496;iHS:GIH:3.246;Tajima_D:MSL:-2.434                                                                                                  | FuLi_D;FuLi_F;iHS;Tajima_D | CCDC92                        |
| ARMC9                         | chr2:232218238-232228238  | -3.598  | 0.095 | -6.228 | -5.622 | 2.802 | -2.72    | Tajima_D:KHV:-2.72;PJL:-2.636                                                                                                                                                                | Tajima_D                   | ARMC10                        |
| SLC9B1;UBE2D3;CISD3           | chr4:103774445-103868879  | -2.926  | 0.064 | -4.983 | -3.841 | 3.37  | 2.203    | iHS:CEU:3.37;IBS:3.174                                                                                                                                                                       | iHS                        | SLC9B1;UBE2D3;CISD3           |
| HDAC9                         | chr7:18477745-18487745    | -5.143  | 0.03  | -6.793 | -5.937 | 1.474 | -2.645   | Tajima_D:TSI:-2.645                                                                                                                                                                          | Tajima_D                   | HDAC9                         |
| HDAC9                         | chr7:18497745-18556976    | -5.394  | 0.025 | -7.058 | -5.788 | 1.708 | -2.524   | FayWu_H:ACB:-5.394;FuLi_F:CEU:-5.788;Tajima_D:ACB:-2.524;ASW:-2.524;LWK:-2.452                                                                                                               | FayWu_H;FuLi_F;Tajima_D    | HDAC9                         |
| C9orf153                      | chr9:88844882-88864882    | 7.169   | 0.079 | -3.529 | 11.097 | 0.858 | 34.961   | Tajima_D:CEU:34.961;FIN:34.436                                                                                                                                                               | Tajima_D                   | C9orf154                      |
| SLC9A6                        | chrX:135086273-135096273  | 1.861   | 0.039 | -5.473 | -4.828 | NA    | -2.371   | FuLi_D:GWD:-5.473                                                                                                                                                                            | FuLi_D                     | SLC9A7                        |
| CCDC57                        | chr17:80077339-80087339   | -3.667  | 0.208 | -1.482 | 3.024  | 3.444 | 3.829    | iHS:GIH:3.444                                                                                                                                                                                | iHS                        | CCDC58                        |
| CCSER1                        | chr4:91061843-91071843    | -1.873  | 0.126 | -2.65  | 1.596  | 3.293 | 2.357    | iHS:STU:3.293                                                                                                                                                                                | iHS                        | CCSER2                        |
| CDH18                         | chr5:19774951-19784951    | -1.362  | 0.029 | -6.399 | -5.355 | 1.405 | -2.105   | FuLi_D:GBR:-6.399                                                                                                                                                                            | FuLi_D                     | CDH19                         |
| CNTNAP2                       | chr7:147365347-147375347  | -8.089  | 0.057 | -4.401 | -4.164 | 1.303 | -2.584   | FayWu_H:BEB:-8.089;GBR:-7.594;ITU:-7.279;PJL:-6.913;STU:-7.284                                                                                                                               | FayWu_H                    | CNTNAP3                       |
| ANKRD17;COX18                 | chr4:73917184-73962806    | -1.442  | 0.034 | -6.551 | -5.643 | 1.288 | -2.171   | FuLi_D:ESN:-6.551;FuLi_F:ESN:-5.643                                                                                                                                                          | FuLi_D;FuLi_F              | ANKRD17;COX19                 |
| DDX17                         | chr22:38902128-38912128   | -1.54   | 0.031 | -5.816 | -4.85  | 2.864 | -1.815   | FuLi_D:FIN:-5.816                                                                                                                                                                            | FuLi_D                     | DDX18                         |
| WDTC1                         | chr1:27623350-27633350    | -0.861  | 0.02  | -6.435 | -5.864 | 1.189 | -2.497   | FuLi_F:CDX:-5.864                                                                                                                                                                            | FuLi_F                     | WDTC2                         |
| DTNA                          | chr18:32157991-32177991   | -6.435  | 0.118 | -6.494 | -5.783 | 1.419 | -2.718   | Tajima_D:BEB:-2.718                                                                                                                                                                          | Tajima_D                   | DTNA                          |
| DTWD2                         | chr5:118169069-118179069  | -7.827  | 0.112 | -3.758 | -3.174 | 1.131 | -2.319   | FayWu_H:JPT:-7.827                                                                                                                                                                           | FayWu_H                    | DTWD3                         |
| DTNBP1                        | chr6:15663330-15683330    | -2.397  | 0.082 | -8.243 | -6.948 | 1.66  | -2.504   | FuLi_D:CDX:-6.637;CHB:-8.243;FuLi_F:CDX:-5.892;CHB:-6.948                                                                                                                                    | FuLi_D;FuLi_F              | DTNBP2                        |
| TAF12;RAB42                   | chr1:28919249-28929249    | -1.447  | 0.023 | -5.053 | -4.395 | 1.375 | -2.379   | Tajima_D:MSL:-2.379                                                                                                                                                                          | Tajima_D                   | TAF12;RAB43                   |
| CYP4F12;CYP4F3                | chr19:15773081-15783081   | -2.289  | 0.084 | 2.117  | 2.959  | 1.545 | 3.064    | FuLi_D:STU:2.117                                                                                                                                                                             | FuLi_D                     | CYP4F12;CYP4F4                |
| FGF12                         | chr3:192198506-192208506  | -3.609  | 0.111 | -6.982 | -6.131 | 2.009 | -2.64    | FuLi_F:TSI:-6.131;Tajima_D:TSI:-2.64                                                                                                                                                         | FuLi_F;Tajima_D            | FGF13                         |
| DCAF12                        | chr9:34078991-34088991    | 1.342   | 0.065 | -7.273 | -5.505 | 0.878 | 1.587    | FuLi_D:CHS:-7.273                                                                                                                                                                            | FuLi_D                     | DCAF13                        |
| FGF12                         | chr3:192198506-192208506  | -3.609  | 0.111 | -6.982 | -6.131 | 2.009 | -2.64    | FuLi_F:TSI:-6.131;Tajima_D:TSI:-2.64                                                                                                                                                         | FuLi_F;Tajima_D            | FGF13                         |
| FHIT                          | chr3:59865677-59885677    | -5.495  | 0.081 | -5.914 | -5.423 | 2.316 | -2.687   | Tajima_D:JPT:-2.687                                                                                                                                                                          | Tajima_D                   | FHIT                          |
| nonCoding73618;nonCoding73618 | chr15:45613662-45692398   | -4.004  | 0.343 | -3.124 | 2.377  | 1.772 | 2.865    | Fst:CEU2CHB:0.343                                                                                                                                                                            | Fst                        | nonCoding73618;nonCoding73618 |
| GLI2                          | chr2:121693646-121723646  | -5.966  | 0.195 | -6.22  | -5.616 | 2.844 | -2.805   | Tajima_D:CEU:-2.636;KHV:-2.805                                                                                                                                                               | Tajima_D                   | GLI3                          |
| HPCAL1                        | chr2:10473150-10483150    | -5.566  | 0.091 | 2.294  | 1.851  | 0.803 | 1.488    | FuLi_D:IBS:2.294                                                                                                                                                                             | FuLi_D                     | HPCAL2                        |

## CKD-associated GWAS genes under natural selection

| GeneID           | Coordinates               | FayWu_H | Fst   | FuLi_D | FuLi_F | iHS   | Tajima_D | Statistic:Population values                                                                                                                                                                                                                                                                   | statistic               | GeneID                |
|------------------|---------------------------|---------|-------|--------|--------|-------|----------|-----------------------------------------------------------------------------------------------------------------------------------------------------------------------------------------------------------------------------------------------------------------------------------------------|-------------------------|-----------------------|
| LINC02210-CRHR1  | chr17:43756461-43794501   | -7.886  | 0.132 | 2.152  | -4.561 | 1.164 | -2.621   | FayWu_H:GWD:-5.696;ITU:-6.66;JPT:-7.886;FuLi_D:IBS:2.152;Tajima_D:JPT:-2.621                                                                                                                                                                                                                  | FayWu_H;FuLi_D;Tajima_D | LINC02210-CRHR1       |
| LINC02210-CRHR1  | chr17:43795221-43815221   | -5.496  | 0.118 | -3.965 | -3.514 | 1.87  | 3.213    | FayWu_H:ESN:-5.496;YRI:-5.167                                                                                                                                                                                                                                                                 | FayWu_H                 | LINC02210-CRHR1       |
| CRHR1;LINC02210- | chr17:43890723-43900723   | -8.931  | 0.134 | -4.619 | -4.306 | 1.273 | 2.878    | FayWu_H:ASW:-4.828;GWD:-5.69;JPT:-8.931;STU:-6.752                                                                                                                                                                                                                                            | FayWu_H                 | CRHR1;LINC02210-CRHR1 |
| CRHR1;LINC02210- | chr17:43900808-43927762   | -4.502  | 0.135 | -6.915 | -5.784 | 0.903 | 3.048    | FuLi_D:JPT:-6.915;FuLi_F:JPT:-5.784                                                                                                                                                                                                                                                           | FuLi_D;FuLi_F           | CRHR1;LINC02210-CRHR1 |
| PHLPP1           | chr18:60394354-60414354   | -4.763  | 0.026 | -6.699 | -5.571 | 1.77  | -2.356   | FuLi_D:YRI:-6.699;FuLi_F:GWD:-5.123;YRI:-5.571                                                                                                                                                                                                                                                | FuLi_D;FuLi_F           | PHLPP1                |
| PHLPP1           | chr18:60444762-60454762   | -5.275  | 0.027 | -6.162 | -5.575 | 2.273 | -2.528   | FayWu_H:ESN:-5.275;Tajima_D:ACB:-2.528;ESN:-2.34;GWD:-2.387;YRI:-2.38                                                                                                                                                                                                                         | FayWu_H;Tajima_D        | PHLPP1                |
| LPP              | chr3:187955175-187965175  | -4.047  | 0.038 | -7.46  | -5.263 | 1.168 | -1.263   | FuLi_D:CEU:-7.46                                                                                                                                                                                                                                                                              | FuLi_D                  | LPP                   |
| LPP              | chr3:188425123-188435123  | -2.903  | 0.046 | -5.879 | -5.092 | 1.001 | -2.417   | Tajima_D:ACB:-2.417                                                                                                                                                                                                                                                                           | Tajima_D                | LPP                   |
| LRIG1            | chr3:66551657-66561657    | -4.061  | 0.062 | -5.164 | -4.918 | 2.125 | -2.629   | Tajima_D:IBS:-2.629                                                                                                                                                                                                                                                                           | Tajima_D                | LRIG2                 |
| LUZP2            | chr11:24633620-24643620   | -2.445  | 0.125 | 2.061  | 2.479  | 1.312 | 2.359    | FuLi_D:LWK:2.061                                                                                                                                                                                                                                                                              | FuLi_D                  | LUZP2                 |
| LUZP2            | chr11:25020012-25094133   | -3.632  | 0.277 | -1.923 | 2.237  | 1.458 | 3.067    | Fst:YRI2CHB:0.277                                                                                                                                                                                                                                                                             | Fst                     | LUZP2                 |
| MPPED2           | chr11:30578308-30588308   | -1.307  | 0.062 | -7.369 | -5.945 | 0.999 | -2.001   | FuLi_D:TSI:-7.369                                                                                                                                                                                                                                                                             | FuLi_D                  | MPPED3                |
| MYO19            | chr17:34874508-34897224   | 0.625   | 0.039 | -6.705 | -5.516 | 1.731 | -1.773   | FuLi_D:GIH:-6.705                                                                                                                                                                                                                                                                             | FuLi_D                  | MYO20                 |
| NRG3             | chr10:84042039-84196436   | -4.36   | 0.129 | -4.57  | -3.645 | 3.466 | 3.256    | iHS:BEB:3.456;GIH:3.466                                                                                                                                                                                                                                                                       | iHS                     | NRG4                  |
| NFE2;HNRNPA1     | chr12:54679667-54689667   | -2.787  | 0.04  | -5.802 | -5.191 | 2.248 | -2.441   | FuLi_D:LWK:-5.802;FuLi_F:LWK:-5.191;Tajima_D:LWK:-2.441                                                                                                                                                                                                                                       | FuLi_D;FuLi_F;Tajima_D  | NFE2;HNRNPA2          |
| NR1H4            | chr12:100889813-100937784 | -2.922  | 0.075 | -7.501 | -6.425 | 1.558 | -2.606   | FuLi_D:CEU:-7.501;GBR:-6.362;FuLi_F:CEU:-6.425;GBR:-5.617;Tajima_D:CEU:-2.606                                                                                                                                                                                                                 | FuLi_D;FuLi_F;Tajima_D  | NR1H5                 |
| NRXN3            | chr14:79156624-79166624   | -2.289  | 0.036 | -5.945 | -4.889 | 1.614 | -1.925   | FuLi_D:LWK:-5.945;FuLi_F:LWK:-4.889                                                                                                                                                                                                                                                           | FuLi_D;FuLi_F           | NRXN3                 |
| NRXN3            | chr14:79685748-79695748   | -6.72   | 0.055 | -5.461 | -5.027 | 1.538 | -2.631   | Tajima_D:FIN:-2.538;TSI:-2.631                                                                                                                                                                                                                                                                | Tajima_D                | NRXN3                 |
| TNRC6C           | chr17:75955578-75965578   | -6.844  | 0.054 | -5.786 | -5.137 | 2.004 | -2.508   | FayWu_H:GIH:-6.844                                                                                                                                                                                                                                                                            | FayWu_H                 | TNRC6C                |
| NRXN1            | chr2:50946332-50956332    | -1.01   | 0.035 | -6.092 | -5.043 | 1.875 | -2.044   | FuLi_D:YRI:-6.092;FuLi_F:YRI:-5.043                                                                                                                                                                                                                                                           | FuLi_D;FuLi_F           | NRXN2                 |
| ZNRF3            | chr22:29340936-29350936   | -2.941  | 0.045 | -4.54  | -4.219 | 2.14  | -2.457   | Tajima_D:ASW:-2.457                                                                                                                                                                                                                                                                           | Tajima_D                | ZNRF4                 |
| TNRC6B           | chr22:40603489-40634595   | -2.172  | 0.25  | -3.05  | -2.954 | 1.753 | 2.489    | Fst:YRI2CHB:0.25                                                                                                                                                                                                                                                                              | Fst                     | TNRC6B                |
| TNRC6B           | chr22:40709666-40719666   | -1.71   | 0.054 | -5.213 | -4.737 | 1.542 | -2.276   | FuLi_F:MSL:-4.737                                                                                                                                                                                                                                                                             | FuLi_F                  | TNRC6B                |
| HNRNPD           | chr4:83235670-83279350    | -1.958  | 0.071 | -3.149 | -2.906 | 3.707 | -1.458   | iHS:YRI:3.707                                                                                                                                                                                                                                                                                 | iHS                     | HNRNPD                |
| NREP             | chr5:111262485-111282485  | 0.909   | 0.031 | -5.32  | -4.136 | 2.017 | 1.667    | FuLi_D:MSL:-5.32                                                                                                                                                                                                                                                                              | FuLi_D                  | NREP                  |
| NR3C1            | chr5:142664620-142674620  | -2.906  | 0.031 | -5.566 | -4.937 | 1.78  | -2.228   | FuLi_D:ESN:-5.566;FuLi_F:ESN:-4.937                                                                                                                                                                                                                                                           | FuLi_D;FuLi_F           | NR3C2                 |
| ZNRF2            | chr7:30335443-30375387    | -2.325  | 0.044 | -7.249 | -6.268 | 1.44  | -2.645   | FuLi_D:TSI:-7.249;FuLi_F:TSI:-6.268;Tajima_D:TSI:-2.645                                                                                                                                                                                                                                       | FuLi_D;FuLi_F;Tajima_D  | ZNRF3                 |
| NR6A1            | chr9:127272821-127292821  | -2.55   | 0.06  | -7.719 | -6.713 | 1.94  | -2.622   | FuLi_D:TSI:-7.719;FuLi_F:TSI:-6.713;Tajima_D:TSI:-2.622                                                                                                                                                                                                                                       | FuLi_D;FuLi_F;Tajima_D  | NR6A1                 |
| NR6A1            | chr9:127351196-127476030  | -5.306  | 0.056 | -7.029 | -5.948 | 4.183 | -2.472   | iHS:ACB:3.773;ESN:4.183;GWD:3.987;YRI:3.609                                                                                                                                                                                                                                                   | iHS                     | NR6A1                 |
| NRG3             | chr10:84042039-84196436   | -4.36   | 0.129 | -4.57  | -3.645 | 3.466 | 3.256    | iHS:BEB:3.456;GIH:3.466                                                                                                                                                                                                                                                                       | iHS                     | NRG4                  |
| PARP15           | chr3:122298894-122308894  | -2.073  | 0.044 | 2.071  | 3.067  | 1.136 | 3.527    | FuLi_D:ACB:2.071                                                                                                                                                                                                                                                                              | FuLi_D                  | PARP16                |
| PLGRKT           | chr9:5369625-5389625      | 9.826   | 0.059 | -2.266 | 26.302 | 0.925 | 72.567   | FuLi_F:BEB:12.091;CDX:15.515;CEU:15.751;FIN:16.4;GBR:17.05;IBS:26.302;ITU:17.025;KHV:15.434;PIL:26.152;STU:15.977;YRI:14.934;Tajima_D:BEB:36.277;CDX:40.397;CEU:44.763;CHB:32.429;FIN:46.398;GBR:44.455;GIH:35.815;IBS:71.045;ITU:48.362;KHV:39.83;PIL:72.567;STU:46.105;TSI:36.118;YRI:37.05 | FuLi_F;Tajima_D         | PLGRKT                |
| PTPN13           | chr4:87576857-87635731    | -5.626  | 0.025 | -6.645 | -6.021 | 1.379 | -2.454   | Tajima_D:LWK:-2.454                                                                                                                                                                                                                                                                           | Tajima_D                | PTPN13                |
| PTPN13           | chr4:87705893-87715893    | -7.519  | 0.065 | -4.287 | -4.063 | 1.753 | -2.431   | FayWu_H:JPT:-7.519                                                                                                                                                                                                                                                                            | FayWu_H                 | PTPN13                |

CKD-associated GWAS genes under natural selection

| GeneID  | Coordinates               | FayWu_H | Fst   | FuLi_D | FuLi_F | iHS   | Tajima_D | Statistic:Population values                                                                                                                                                                                                                                                                                                                                                                                                                                                                                                                                                                                                                                                                                                                            | statistic               | GeneID  |
|---------|---------------------------|---------|-------|--------|--------|-------|----------|--------------------------------------------------------------------------------------------------------------------------------------------------------------------------------------------------------------------------------------------------------------------------------------------------------------------------------------------------------------------------------------------------------------------------------------------------------------------------------------------------------------------------------------------------------------------------------------------------------------------------------------------------------------------------------------------------------------------------------------------------------|-------------------------|---------|
| PTPRN2  | chr7:157356240-157422739  | 8.451   | 0.057 | -3.019 | 23.196 | 2.3   | 63.272   | FuLi_F:ACB:19.044;ASW:19.753;BEB:17.568;CDX:17.342;CHB:15.91;CHS:15.342;ESN:23.196;FIN:15.794;GBR:15.313;GIH:17.291;GWD:19.378;IBS:15.043;ITU:17.053;JPT:17.66;KHV:17.938;LWK:21.122;MSL:21.47;PIL:15.995;STU:16.007;YRI:20.485;Tajima_D:ACB:51.571;ASW:55.878;BEB:47.763;CDX:48.208;CHB:42.685;CHS:47.128;ESN:63.272;FIN:42.431;GBR:41.443;GIH:46.624;GWD:52.375;IBS:40.204;ITU:46.24;JPT:47.54;KHV:48.354;LWK:57.921;MSL:58.937;PIL:43.961;STU:43.994;TSI:35.069;YRI:55.111                                                                                                                                                                                                                                                                          | FuLi_F;Tajima_D         | PTPRN2  |
| PTPRN2  | chr7:157452350-157826789  | 16.276  | 0.093 | -4.784 | 60.05  | 1.606 | 165.448  | FayWu_H:ACB:12.049;ASW:14.079;BEB:14.717;CDX:14.952;CEU:16.231;CHS:14.626;FIN:16.276;GBR:16.115;GIH:15.228;GWD:11.892;IBS:14.624;ITU:16.095;JPT:12.488;KHV:16.203;LWK:11.843;PIL:14.703;STU:14.568;TSI:15.775;FuLi_F:ACB:50.224;ASW:53.405;BEB:55.651;CDX:54.024;CEU:55.781;CHB:45.563;CHS:52.082;ESN:49.56;FIN:55.706;GBR:55.414;GIH:56.304;GWD:44.189;IBS:54.719;ITU:60.05;JPT:43.657;KHV:57.482;LWK:38.46;MSL:48.094;PIL:55.646;STU:53.734;TSI:55.603;YRI:47.472;Tajima_D:ACB:137.687;ASW:153.069;BEB:153.559;CDX:149.143;CEU:152.855;CHB:124.117;CHS:142.249;ESN:136.364;FIN:152.217;GBR:152.696;GIH:154.119;GWD:120.739;IBS:148.88;ITU:165.448;JPT:119.009;KHV:157.187;LWK:106.337;MSL:133.341;PIL:155.63;STU:150.248;TSI:151.53;YRI:129.031      | FayWu_H;FuLi_F;Tajima_D | PTPRN2  |
| PTPRN2  | chr7:157852838-157991205  | 15.584  | 0.047 | -2.9   | 47.352 | 1.111 | 125.872  | FayWu_H:ACB:12.104;ASW:12.396;BEB:13.856;CDX:15.39;CEU:12.718;CHB:15.049;CHS:14.755;ESN:13.281;FIN:15.557;GBR:15.237;GIH:12.15;IBS:12.732;ITU:12.142;JPT:14.296;KHV:15.584;LWK:14.483;MSL:12.53;PIL:12.827;TSI:14.821;YRI:12.38;FuLi_F:ACB:34.961;ASW:33.356;BEB:40.85;CDX:19.138;CEU:25.019;CHB:25.632;CHS:26.922;ESN:47.352;FIN:38.328;GBR:27.818;GIH:25.529;GWD:32.814;IBS:40.399;ITU:18.406;JPT:24.305;KHV:22.514;LWK:35.494;MSL:26.081;PIL:41.263;STU:23.083;TSI:25.932;YRI:35.065;Tajima_D:ACB:92.626;ASW:91.743;BEB:112.442;CDX:48.518;CEU:69.558;CHB:66.92;CHS:70.461;ESN:125.872;FIN:104.415;GBR:77.414;GIH:70.851;GWD:86.865;IBS:109.657;ITU:49.622;JPT:63.448;KHV:62.737;LWK:94.865;MSL:72.938;PIL:115.125;STU:65.485;TSI:71.669;YRI:92.274 | FayWu_H;FuLi_F;Tajima_D | PTPRN2  |
| PTPRN2  | chr7:158155619-158337038  | 15.217  | 0.063 | 0      | 0      | 2.168 | 0        | FayWu_H:ACB:12.85;ASW:12.593;BEB:13.095;CEU:13.234;CHB:14.201;CHS:14.215;ESN:12.684;FIN:15.217;GBR:14.228;GIH:14.187;GWD:12.984;IBS:13.088;ITU:13.632;KHV:13.581;LWK:13.002;MSL:14.408;PIL:13.944;STU:13.682;TSI:12.883;YRI:12.428                                                                                                                                                                                                                                                                                                                                                                                                                                                                                                                     | FayWu_H                 | PTPRN2  |
| LILRB1  | chr19:55125038-55135038   | -3.43   | 0.055 | 2.215  | -3.306 | 1.759 | 1.759    | FuLi_D:IBS:2.215                                                                                                                                                                                                                                                                                                                                                                                                                                                                                                                                                                                                                                                                                                                                       | FuLi_D                  | LILRB2  |
| DYNLRB1 | chr20:33116144-33126144   | -1.256  | 0.017 | -6.496 | -5.616 | 1.354 | -2.099   | FuLi_D:GBR:-6.496;FuLi_F:GBR:-5.616                                                                                                                                                                                                                                                                                                                                                                                                                                                                                                                                                                                                                                                                                                                    | FuLi_D;FuLi_F           | DYNLRB2 |
| RBM19   | chr12:114317275-114327275 | 1.557   | 0.059 | 2.07   | -3.762 | 1.692 | 2.688    | FuLi_D:KHV:2.07                                                                                                                                                                                                                                                                                                                                                                                                                                                                                                                                                                                                                                                                                                                                        | FuLi_D                  | RBM20   |
| RNLS    | chr10:90284810-90294810   | -2.743  | 0.029 | -5.447 | -4.684 | 1.375 | -1.86    | FuLi_F:ESN:-4.684                                                                                                                                                                                                                                                                                                                                                                                                                                                                                                                                                                                                                                                                                                                                      | FuLi_F                  | RNLS    |
| ROBO1   | chr3:79026766-79036766    | -2.457  | 0.032 | -6.779 | -5.952 | 1.981 | -2.37    | FuLi_D:GIH:-6.779;FuLi_F:FIN:-5.02;GIH:-5.952                                                                                                                                                                                                                                                                                                                                                                                                                                                                                                                                                                                                                                                                                                          | FuLi_D;FuLi_F           | ROBO1   |
| ROBO1   | chr3:79164098-79174098    | -1.429  | 0.024 | -5.867 | -5.087 | 1.439 | -2.32    | FuLi_D:ESN:-5.867;FuLi_F:ESN:-5.087                                                                                                                                                                                                                                                                                                                                                                                                                                                                                                                                                                                                                                                                                                                    | FuLi_D;FuLi_F           | ROBO1   |
| ROR1    | chr1:64344304-64364304    | -4.95   | 0.146 | -6.038 | -5.521 | 1.867 | -2.654   | Tajima_D:CHS:-2.654                                                                                                                                                                                                                                                                                                                                                                                                                                                                                                                                                                                                                                                                                                                                    | Tajima_D                | ROR2    |
| RORA    | chr15:61422898-61432898   | -1.837  | 0.038 | -5.897 | -4.934 | 1.939 | -2.161   | FuLi_D:YRI:-5.897;FuLi_F:YRI:-4.934                                                                                                                                                                                                                                                                                                                                                                                                                                                                                                                                                                                                                                                                                                                    | FuLi_D;FuLi_F           | RORA    |
